# Supplementary material
Source: PubMed Central journal article supplement (PMC5610065)
Supplement: NIHMS865504-supplement.pdf [file NIHMS865504-supplement.pdf]

# Transcriptome Alterations in Prefrontal Pyramidal Cells Distinguish Schizophrenia from Bipolar and Major Depressive Disorders

## Supplemental Information

### ***Supplementary Methods***

*Laser microdissection.* The right hemisphere of each brain was blocked coronally, immediately frozen, and stored at -80°C. For all procedures, samples from each subject in a given tetrad were prepared and processed together in order to control for experimental variance. Tissue sections (12 µm) containing DLPFC area 9 were cut on a cryostat, mounted on glass polyethylene naphthalate membrane slides (Leica Microsystems, Bannockburn, IL), which were blinded as to diagnosis, and stained with thionin for Nissl substance. Using a Leica laser microdissection system, pyramidal cell bodies with a characteristic triangular shape and prominent apical dendrite were identified and dissected from L3 or L5 as previously described and illustrated (1). For each subject, two pooled samples of 100 individually-dissected PCs were obtained from each layer of adjacent tissue sections. To prevent potential confounding effects of collection order, PCs were collected in the opposite order from each layer across the two sections per subject.

*Data filtering.* The Affymetrix control probesets were removed, as they have no biological relevance. In order to eliminate low expressing and non-informative probesets, we used a modification of a previously described filtering procedure based on a threshold determined by the contrast in expression levels of Y-chromosome genes between male and female subjects (2). For each Y-linked probe, the fold-enrichment in the male subjects relative to the female subjects was plotted against the average expression level in all male subjects (Supplementary Figure S1 and Supplementary Table S2). The inflection point in a lowess curve fitted to the data was determined, and probesets with expression values below the inflection point were

eliminated because these expression values cannot be discriminated from noise. This procedure, which generated filtering thresholds at 3.5 and 3.2 for layers 3 and 5, respectively, yielded 23,937 and 27,173 probesets for these layers. We chose to keep their union (i.e., 27,298 probesets) for analysis in order to detect potentially informative probesets in either layer.

*Detection of differentially-expressed transcripts within each diagnostic group.* We followed a previously reported procedure (1) to fit a random intercept model (3) for each diagnosis separately in order to account for the matched design and the potential impact of covariates including sex, age, RIN, brain pH, PMI, death by suicide, presence of psychosis, presence of mood diagnosis, use of antidepressant, antipsychotic, or benzodiazepines and/or anticonvulsant medications or tobacco at time of death. To retain statistical power, only covariates present in at least 5 but not more than 13 subjects in a diagnostic group were included. For example, mood was included as a covariate in the SZ subject group due to the presence of 6 subjects with schizoaffective disorder but was not included in the BP or MDD subject groups. Conversely, psychosis was included for both BP and MDD subject groups but was not included in the SZ group. Based on these criteria, the following covariates were included: 10 covariates for SZ (sex, age, RIN, brain pH, PMI, death by suicide, presence of mood diagnosis, antidepressant, benzodiazepine and/or anticonvulsant, or tobacco use at time of death); 11 covariates for BP (sex, age, RIN, brain pH, PMI, death by suicide, presence of psychosis, antidepressant, antipsychotic, benzodiazepines and/or anticonvulsants, or tobacco use at time of death); 9 covariates for MDD (sex, age, RIN, brain pH, PMI, death by suicide, presence of psychosis, antidepressant or tobacco use at time of death). For each of the three diagnostic groups, we adopted the following random intercept model:

$$Y_{gik} = \gamma_{gi} + \sum_{l=1}^L \beta_{gl} X_{lik} + \alpha_{gk} + \varepsilon_{gik}$$

where  $Y_{gik}$  is the expression intensity of probe  $g$ , group  $i$  ( $i = 0$  for control group,  $i = 1$  for diagnosis group) and diagnosis-control pair  $k$ ,  $\gamma_{g0}$  is the baseline expression level for gene  $g$  for control group and  $\gamma_{g1}$  is the expression level in diagnosis group.  $\beta_{gl}$  is the covariate effect of gene  $g$  and covariate  $l$ , and  $X_{lik}$  is the covariate value for group  $i$ , subject  $k$  and covariate  $l$ .  $\alpha_{gk}$  is the random effect of diagnostic-control pair  $k$  for gene  $g$  such that  $\alpha_{gk} \sim N(0, \sigma_g^2)$ . For each model, we included  $\leq 2$  of  $L$  covariates where  $L$  is the number of covariates passing the inclusion criteria in each diagnosis group. Finally,  $\varepsilon_{gik}$  is the error term,  $\varepsilon_{gik} \sim N(0, \sigma_{g0}^2)$ . The best model was determined through the Bayesian Information Criterion (BIC) and the p-value of diagnosis effect was assessed via likelihood ratio test. We used permutation (by randomly permuting the subjects 500 times) to correct the p-value since the p-value from likelihood ratio test was biased from model selection. Since the p-value from likelihood ratio test (denoted by  $p_{g0}$ , where  $g$  ( $1 \leq g \leq G$ ) is probe index and 0 denotes the correct group label) was biased from model selection, we permuted group label  $B$  (= 500) times, and similarly calculated the permuted p-values  $p_{gb}$  ( $1 \leq b \leq B$ ). We calculated the corrected p-value  $p_g^*$  by

$$p_g^* = \frac{\sum_{b=0}^B \sum_{g=1}^G I(p_{gb} \leq p_{g0})}{G \times (B + 1)}$$

The resulting corrected p-value was adjusted for multiple comparisons using Storey's procedure (4). Given the small sample size of our study, the probe sets that were differentially expressed between a given diagnostic group and the UC group, were identified using a false discovery rate of 20%. The same probesets were used to perform pathway enrichment analyses.

*Effects of clinical covariates.* In order to explore whether any gene possessed an effect of suicide or psychosis, we used a linear regression model considering clinical variable (suicide or psychosis) as main effect and adjusting for diagnosis effect (SZ, BP and MDD) as covariates:

$$Y_{glik} = \beta_{gl} + \gamma_{gi} + \varepsilon_{glik},$$

where  $Y_{glik}$  is the expression intensity of probe  $g$ , group  $l$  ( $l = 0$  for control group - clinical unaffected group,  $l = 1$  for clinical affected group, e.g. suicide group or psychosis group), diagnosis  $i$ , ( $i = 1,2,3$  representing SZ, BP and MDD group) and subject index  $k$ .  $\beta_{g0}$  is the baseline expression level for gene  $g$  for control group and  $\beta_{g1}$  is the expression level in clinical affected group.  $\gamma_{gi}$  is the diagnosis effect of gene  $g$  and diagnosis  $i$ .  $\varepsilon_{glik}$  is the error term,  $\varepsilon_{glik} \sim N(0, \sigma_g^2)$ . Note that UC subjects were not included since they do not have either suicide or psychosis. Also SZ subjects were excluded for psychosis analysis. P-values of clinical effect  $\beta_{g1} - \beta_{g0}$  (suicide or psychosis) were adjusted for multiple comparisons using Benjamini-Hochberg procedure.

**Supplementary Tables****Supplementary Table S1.** Full demographic data for UC, SZ, BP and MDD subjects.

| Tetrad | HU#   | Subject Group | DSM-IV Diagnoses | MOD        | COD                      | Sex | Age | Race | PMI  | pH  | RIN | Storage Time (mo) | Hand Preference | Meds ATOD | Tob ATOD |
|--------|-------|---------------|------------------|------------|--------------------------|-----|-----|------|------|-----|-----|-------------------|-----------------|-----------|----------|
| 1      | 10003 | UC            | None             | Accidental | Trauma                   | M   | 49  | W    | 21.2 | 6.5 | 8.4 | 109.0             | R               | N         | N        |
| 2      | 1374  | UC            | None             | Natural    | ASCVD                    | M   | 43  | W    | 21.7 | 6.6 | 7.2 | 80.4              | R               | O         | Y        |
| 3      | 1282  | UC            | None             | Natural    | ASCVD                    | F   | 39  | W    | 24.5 | 6.8 | 7.5 | 95.7              | R               | N         | N        |
| 4      | 1298  | UC            | None             | Natural    | ASCVD                    | M   | 48  | W    | 24.5 | 6.5 | 7.9 | 92.7              | R               | N         | N        |
| 5      | 1047  | UC            | None             | Natural    | ASCVD                    | M   | 43  | W    | 13.8 | 6.6 | 9.0 | 126.7             | R               | O         | N        |
| 6      | 795   | UC            | None             | Natural    | Ruptured aortic aneurysm | M   | 68  | W    | 11.8 | 6.8 | 8.2 | 172.2             | R               | N         | N        |
| 7      | 1789  | UC            | None             | Natural    | ASCVD                    | F   | 53  | W    | 13.7 | 6.8 | 8.5 | 5.4               | R               | N         | Y        |
| 8      | 1324  | UC            | None             | Natural    | Dissection of the aorta  | M   | 43  | W    | 22.3 | 6.7 | 7.3 | 87.6              | L               | N         | N        |
| 9      | 1444  | UC            | None             | Natural    | Pulmonary embolism       | M   | 46  | W    | 22.0 | 6.3 | 8.4 | 66.7              | R               | N         | N        |
| 10     | 1086  | UC            | None             | Natural    | ASCVD                    | M   | 51  | W    | 24.2 | 6.6 | 8.1 | 120.7             | R               | N         | Y        |

| Tetrad | HU#  | Subject Group | DSM-IV Diagnoses                                                              | MOD        | COD                   | Sex | Age  | Race | PMI  | pH  | RIN | Storage Time (mo) | Hand Preference | Meds ATOD | Tob ATOD |
|--------|------|---------------|-------------------------------------------------------------------------------|------------|-----------------------|-----|------|------|------|-----|-----|-------------------|-----------------|-----------|----------|
| 11     | 1391 | UC            | None                                                                          | Natural    | ASCVD                 | F   | 51   | W    | 7.8  | 6.6 | 7.1 | 76.5              | L               | O         | Y        |
| 12     | 1196 | UC            | None                                                                          | Accidental | Asphyxiation          | F   | 36   | W    | 14.5 | 6.4 | 8.2 | 108.8             | R               | O         | N        |
| 13     | 1293 | UC            | None                                                                          | Accidental | Trauma                | F   | 65   | W    | 18.5 | 6.5 | 7.0 | 93.8              | R               | N         | N        |
| 14     | 1153 | UC            | None                                                                          | Natural    | ASCVD                 | M   | 55   | W    | 28.0 | 6.1 | 8.0 | 113.5             | R               | N         | N        |
| 15     | 789  | UC            | None                                                                          | Accidental | Asphyxiation          | M   | 22   | W    | 20.1 | 6.8 | 7.8 | 173.7             | R               | N         | N        |
| 16     | 686  | UC            | None                                                                          | Natural    | ASCVD                 | F   | 52   | W    | 22.6 | 7.1 | 8.5 | 191.0             | R               | O         | Y        |
| 17     | 1247 | UC            | None                                                                          | Natural    | ASCVD                 | F   | 58   | W    | 22.7 | 6.4 | 8.4 | 101.2             | R               | O         | N        |
| 18     | 1092 | UC            | None                                                                          | Natural    | Mitral Valve Prolapse | F   | 40   | B    | 16.6 | 6.8 | 8.0 | 120.1             | R               | O         | N        |
| 19     | 840  | UC            | Adjustment Disorder with depressed mood, current; AAR (in remission 20 years) | Natural    | ASCVD                 | F   | 41   | W    | 15.4 | 6.6 | 9.1 | 162.5             | R               | N         | Y        |
|        |      |               |                                                                               |            | mean                  |     | 47.5 |      | 19.3 | 6.6 | 8.0 | 110.4             |                 |           |          |
|        |      |               |                                                                               |            | s.d.                  |     | 10.5 |      | 5.3  | 0.2 | 0.6 | 43.4              |                 |           |          |

| Tetrad | HU#   | Subject Group | DSM-IV Diagnoses                         | MOD        | COD                    | Sex | Age | Race | PMI  | pH  | RIN | Storage Time (mo) | Hand Preference | Meds ATOD    | Tob ATOD |
|--------|-------|---------------|------------------------------------------|------------|------------------------|-----|-----|------|------|-----|-----|-------------------|-----------------|--------------|----------|
| 1      | 1102  | BP            | Bipolar NOS;<br>ADR;<br>ODC;<br>OAC; OAR | Natural    | ASCVD                  | M   | 50  | W    | 12.1 | 6.7 | 8.3 | 119.0             | L               | B C D        | Y        |
| 2      | 1121  | BP            | Bipolar I,<br>PF; ADR                    | Natural    | Pulmonary embolism     | M   | 40  | W    | 18.5 | 6.4 | 8.3 | 116.6             | R               | C P          | N        |
| 3      | 957   | BP            | Bipolar I                                | Suicide    | Drowning               | F   | 39  | W    | 22.2 | 6.7 | 8.4 | 139.7             | R               | D O          | U        |
| 4      | 886   | BP            | Bipolar I;<br>ADC                        | Suicide    | Gunshot                | M   | 45  | W    | 27.2 | 7.1 | 8.3 | 155.6             | R               | N            | Y        |
| 5      | 1020  | BP            | Bipolar I,<br>PF; ADC;<br>ODC            | Accidental | Combined drug overdose | M   | 42  | W    | 12.5 | 6.7 | 8.5 | 131.0             | R               | B C D O      | Y        |
| 6      | 1130  | BP            | Bipolar I,<br>PF; AAR                    | Natural    | Esophageal cancer      | M   | 65  | W    | 8.9  | 6.7 | 8.0 | 115.7             | R               | B D O P      | U        |
| 7      | 1048  | BP            | Bipolar I,<br>PF                         | Suicide    | Asphyxiation           | F   | 51  | W    | 21.5 | 6.7 | 7.7 | 126.1             | R               | D            | Y        |
| 8      | 697   | BP            | Bipolar I,<br>PF                         | Suicide    | Incised wounds         | M   | 39  | W    | 24.2 | 6.6 | 7.8 | 189.9             | R               | C            | N        |
| 9      | 1069  | BP            | Bipolar I;<br>AAR                        | Natural    | ASCVD                  | M   | 48  | W    | 18.1 | 6.9 | 8.1 | 123.2             | L               | O            | N        |
| 10     | 1244  | BP            | Bipolar I,<br>PF; AAR;<br>ODC; OAC       | Accidental | Asphyxiation           | M   | 52  | W    | 23.5 | 6.7 | 8.0 | 101.4             | R               | B C D O<br>P | Y        |
| 11     | 10004 | BP            | Bipolar I;<br>ODC                        | Accidental | Combined drug overdose | F   | 50  | W    | 11.7 | 6.4 | 8.5 | 108.5             | R               | B O P        | U        |

| Tetrad | HU#   | Subject Group | DSM-IV Diagnoses        | MOD        | COD                    | Sex | Age  | Race | PMI  | pH  | RIN | Storage Time (mo) | Hand Preference | Meds ATOD | Tob ATOD |
|--------|-------|---------------|-------------------------|------------|------------------------|-----|------|------|------|-----|-----|-------------------|-----------------|-----------|----------|
| 12     | 1180  | BP            | Bipolar I, PF           | Suicide    | Jump                   | F   | 28   | W    | 22.3 | 6.3 | 7.5 | 111.2             | R               | D         | N        |
| 13*    | 10006 | BP            | Bipolar I, PF; ADR      | Suicide    | Gunshot                | F   | 55   | W    | 17.5 | 6.4 | 8.1 | 107.3             | R               | N         | Y        |
| 14     | 716   | BP            | Bipolar I; ADC; OAC     | Suicide    | Gunshot                | M   | 58   | W    | 27.7 | 6.8 | 8.3 | 186.3             | R               | O         | U        |
| 15     | 1181  | BP            | Bipolar I, PF; ODC; OAR | Accidental | Morphine overdose      | M   | 28   | W    | 27.4 | 6.2 | 8.0 | 111.2             | L               | B C D O   | Y        |
| 16     | 1328  | BP            | Bipolar NOS             | Natural    | ASCVD                  | F   | 49   | W    | 21.5 | 6.7 | 7.5 | 86.9              | R               | B C D L O | N        |
| 17     | 1044  | BP            | Bipolar I, PF           | Natural    | ASCVD                  | F   | 56   | W    | 24.5 | 6.1 | 7.1 | 126.9             | L               | B D O P   | N        |
| 18     | 984   | BP            | Bipolar I, PF           | Accidental | Combined drug overdose | F   | 42   | W    | 31.2 | 6.5 | 8.0 | 136.0             | L               | D L P     | Y        |
| 19     | 945   | BP            | Bipolar I; AAC          | Suicide    | Asphyxiation           | F   | 43   | W    | 31.9 | 6.7 | 7.2 | 141.9             | R               | B D O P   | Y        |
|        |       |               |                         |            | mean                   |     | 46.3 |      | 21.3 | 6.6 | 8.0 | 128.1             |                 |           |          |
|        |       |               |                         |            | s.d.                   |     | 9.5  |      | 6.6  | 0.2 | 0.4 | 26.4              |                 |           |          |

| Tetrad | HU#   | Subject Group | DSM-IV Diagnoses        | MOD     | COD                    | Sex | Age | Race | PMI  | pH  | RIN | Storage Time (mo) | Hand Preference | Meds ATOD | Tob ATOD |
|--------|-------|---------------|-------------------------|---------|------------------------|-----|-----|------|------|-----|-----|-------------------|-----------------|-----------|----------|
| 1      | 10010 | MDD           | MDD, recurrent, PF; AAR | Suicide | Amitriptyline overdose | M   | 42  | W    | 14.3 | 6.4 | 7.6 | 106.0             | R               | C D O     | N        |



| Tetrad | HU#  | Subject Group | DSM-IV Diagnoses                            | MOD        | COD                    | Sex | Age | Race | PMI  | pH  | RIN | Storage Time (mo) | Hand Preference | Meds ATOD | Tob ATOD |
|--------|------|---------------|---------------------------------------------|------------|------------------------|-----|-----|------|------|-----|-----|-------------------|-----------------|-----------|----------|
| 2      | 1226 | MDD           | MDD, recurrent;<br>ODC;<br>ODR;<br>OAC; OAR | Natural    | ASCVD                  | M   | 44  | W    | 19.3 | 6.5 | 7.5 | 104.4             | R               | N         | Y        |
| 3      | 967  | MDD           | MDD, recurrent;<br>ADC                      | Natural    | ASCVD                  | F   | 40  | W    | 22.2 | 6.6 | 7.4 | 138.3             | R               | N         | Y        |
| 4      | 1053 | MDD           | MDD                                         | Natural    | ASCVD                  | M   | 47  | W    | 24.0 | 6.6 | 8.1 | 125.4             | R               | N         | N        |
| 5      | 1215 | MDD           | MDD; ADR                                    | Natural    | ASCVD                  | M   | 44  | W    | 11.0 | 6.5 | 7.9 | 106.9             | R               | B O       | Y        |
| 6      | 698  | MDD           | MDD, PF                                     | Suicide    | Hanging                | M   | 59  | W    | 13.0 | 6.6 | 9.0 | 189.5             | R               | D O P     | N        |
| 7      | 1190 | MDD           | MDD, recurrent;<br>ADC                      | Suicide    | Asphyxiation           | F   | 47  | W    | 22.3 | 6.6 | 8.0 | 109.5             | R               | N         | Y        |
| 8      | 668  | MDD           | MDD, PF;<br>AAR                             | Suicide    | Hanging                | M   | 34  | W    | 24.4 | 6.6 | 8.1 | 194.1             | R               | N         | N        |
| 9      | 863  | MDD           | MDD                                         | Natural    | ASCVD                  | M   | 51  | W    | 28.3 | 7.3 | 8.4 | 158.2             | R               | N         | N        |
| 10     | 1312 | MDD           | MDD, recurrent;<br>ADR; ODC                 | Accidental | Combined drug overdose | M   | 51  | W    | 24.6 | 6.5 | 8.1 | 90.0              | R               | O         | N        |
| 11     | 986  | MDD           | MDD, recurrent                              | Natural    | Asthma                 | F   | 53  | W    | 11.9 | 6.7 | 8.7 | 135.9             | R               | D O       | N        |
| 12     | 1157 | MDD           | MDD, recurrent                              | Suicide    | Hanging                | F   | 26  | W    | 13.4 | 6.4 | 7.8 | 113.3             | R               | D         | N        |

| Tetrad | HU#  | Subject Group | DSM-IV Diagnoses             | MOD        | COD                    | Sex | Age  | Race | PMI  | pH  | RIN | Storage Time (mo) | Hand Preference | Meds ATOD | Tob ATOD |
|--------|------|---------------|------------------------------|------------|------------------------|-----|------|------|------|-----|-----|-------------------|-----------------|-----------|----------|
| 13     | 1041 | MDD           | MDD, recurrent, PF; AAC; ODC | Accidental | Combined drug overdose | F   | 52   | W    | 10.3 | 6.5 | 8.4 | 127.5             | R               | B D O P   | Y        |
| 14     | 1071 | MDD           | MDD; AAR                     | Suicide    | Gunshot                | M   | 62   | W    | 26.0 | 6.5 | 8.1 | 122.5             | R               | O         | Y        |
| 15*    | 1131 | MDD           | MDD, recurrent               | Suicide    | Gunshot                | M   | 29   | W    | 26.6 | 6.9 | 8.5 | 115.7             | R               | N         | N        |
| 16     | 1143 | MDD           | MDD, recurrent; ADR; ODC     | Accidental | Combined drug overdose | F   | 49   | W    | 23.4 | 6.4 | 8.1 | 114.5             | R               | B D O     | Y        |
| 17     | 934  | MDD           | MDD, recurrent, PF           | Natural    | ASCVD                  | F   | 54   | W    | 17.9 | 6.2 | 8.2 | 144.9             | R               | D O       | N        |
| 18     | 1289 | MDD           | MDD                          | Natural    | ASCVD                  | F   | 46   | W    | 25.0 | 6.3 | 7.3 | 94.8              | R               | U         | N        |
| 19     | 1221 | MDD           | MDD, recurrent               | Natural    | Pulmonary embolism     | F   | 28   | B    | 24.8 | 6.6 | 7.2 | 105.7             | R               | N         | N        |
|        |      |               |                              |            | mean                   |     | 45.2 |      | 20.1 | 6.6 | 8.0 | 126.2             |                 |           |          |
|        |      |               |                              |            | s.d.                   |     | 10.1 |      | 6.0  | 0.2 | 0.5 | 28.8              |                 |           |          |

| Tetrad | HU#  | Subject Group | DSM-IV Diagnoses | MOD     | COD   | Sex | Age | Race | PMI  | pH  | RIN | Storage Time (mo) | Hand Preference | Meds ATOD | Tob ATOD |
|--------|------|---------------|------------------|---------|-------|-----|-----|------|------|-----|-----|-------------------|-----------------|-----------|----------|
| 1      | 1314 | SZ            | US               | Natural | ASCVD | M   | 50  | W    | 11.0 | 6.5 | 7.2 | 89.8              | R               | C D O P   | N        |

| Tetrad | HU#   | Subject Group | DSM-IV Diagnoses | MOD        | COD                     | Sex | Age | Race | PMI  | pH  | RIN | Storage Time (mo) | Hand Preference | Meds ATOD | Tob ATOD |
|--------|-------|---------------|------------------|------------|-------------------------|-----|-----|------|------|-----|-----|-------------------|-----------------|-----------|----------|
| 2      | 1195  | SZ            | SA               | Natural    | Ischemic ileitis        | M   | 46  | W    | 15.8 | 6.6 | 7.0 | 108.8             | U               | BCOP      | Y        |
| 3      | 1211  | SZ            | SA               | Natural    | Sudden unexpected death | F   | 41  | W    | 20.1 | 6.5 | 7.8 | 107.2             | L               | DOP       | Y        |
| 4      | 1367  | SZ            | SA; ADC; ODR     | Accidental | Combined drug overdose  | M   | 47  | W    | 28.9 | 6.6 | 7.2 | 81.9              | R               | N         | N        |
| 5      | 10024 | SZ            | PS               | Natural    | ASCVD                   | M   | 37  | B    | 6.0  | 6.1 | 7.5 | 100.0             | L               | O         | N        |
| 6      | 1188  | SZ            | US; AAR; OAR     | Natural    | ASCVD                   | M   | 58  | W    | 7.7  | 6.3 | 8.4 | 109.9             | R               | COP       | Y        |
| 7      | 1010  | SZ            | US               | Natural    | Sudden unexpected death | F   | 44  | B    | 18.7 | 6.2 | 8.1 | 132.7             | L               | CDP       | N        |
| 8      | 10020 | SZ            | PS; AAC; OAC     | Suicide    | Salicylate overdose     | M   | 38  | W    | 28.8 | 6.6 | 7.4 | 101.2             | R               | CDP       | Y        |
| 9      | 10025 | SZ            | DS; OAR          | Natural    | ASCVD                   | M   | 52  | B    | 27.1 | 6.7 | 7.8 | 99.8              | R               | N         | Y        |
| 10     | 1088  | SZ            | US; ADC; OAC     | Accidental | Combined drug overdose  | M   | 49  | W    | 21.5 | 6.5 | 8.1 | 120.5             | R               | DOP       | Y        |
| 11     | 1189  | SZ            | SA; AAR          | Suicide    | Combined drug overdose  | F   | 47  | W    | 14.4 | 6.4 | 8.3 | 109.7             | R               | BCDOP     | Y        |
| 12     | 10023 | SZ            | DS               | Suicide    | Drowning                | F   | 25  | B    | 20.1 | 6.7 | 7.4 | 100.4             | R               | BDP       | N        |
| 13     | 843   | SZ            | DS               | Suicide    | Jump                    | F   | 41  | W    | 17.1 | 7.3 | 9.4 | 162.0             | R               | P         | Y        |

| Tetrad | HU#   | Subject Group | DSM-IV Diagnoses | MOD        | COD                    | Sex | Age  | Race | PMI  | pH  | RIN | Storage Time (mo) | Hand Preference | Meds ATOD | Tob ATOD |
|--------|-------|---------------|------------------|------------|------------------------|-----|------|------|------|-----|-----|-------------------|-----------------|-----------|----------|
| 14     | 1263  | SZ            | US; ADR          | Accidental | Asphyxiation           | M   | 62   | W    | 22.7 | 7.1 | 8.5 | 98.8              | R               | DP        | Y        |
| 15     | 1222  | SZ            | US; AAC          | Suicide    | Combined drug overdose | M   | 32   | W    | 30.8 | 6.3 | 7.5 | 105.0             | R               | DP        | N        |
| 16     | 656   | SZ            | SA; ADC          | Suicide    | Gunshot                | F   | 47   | B    | 20.1 | 7.2 | 9.2 | 195.3             | R               | OP        | Y        |
| 17     | 1240  | SZ            | US; ADR          | Natural    | ASCVD                  | F   | 50   | B    | 22.9 | 6.3 | 7.7 | 101.9             | R               | OP        | Y        |
| 18     | 1341  | SZ            | SA; ODC          | Accidental | Trauma                 | F   | 44   | W    | 24.5 | 6.6 | 8.8 | 84.3              | R               | BOP       | N        |
| 19     | 10026 | SZ            | US               | Suicide    | Thermal injuries       | F   | 46   | W    | 23.8 | 6.6 | 7.6 | 99.6              | R               | DOP       | Y        |
|        |       |               |                  |            | mean                   |     | 45.1 |      | 20.1 | 6.6 | 7.9 | 111.0             |                 |           |          |
|        |       |               |                  |            | s.d.                   |     | 8.5  |      | 6.9  | 0.3 | 0.7 | 27.0              |                 |           |          |

Data for schizophrenia subjects 10024 and 10020 (in gray in the table) from pairs 5 and 8 respectively were lost during sample processing and were therefore not used for analysis.

DSM-IV Substance-Related Disorder Diagnoses: ADC (Alcohol Dependence, current at time of death); ADR (Alcohol Dependence, current at time of death); AAC (Alcohol Abuse, current at time of death); AAR (Alcohol Abuse, in remission at time of death); ODC (Other substance Dependence, current at time of death); ODR (Other substance Dependence, in remission at time of death); OAC (Other substance Abuse, current at time of death); OAR (Other substance Abuse, in remission at time of death).

Hand Preference: L (Left); M (Mixed); R (Right); U (Unknown).

Prescribed medications at time of death: B (Benzodiazepines); C (Anticonvulsants); D (Antidepressants); L (Lithium); N (No medications); O (Other medications); P (Antipsychotic); U (Unknown).

Tobacco use at time of death: N (No tobacco); U (Unknown); Y (Yes, chew, cigarette, pipe or other).

DSM-IV Psychiatric Diagnoses: DS (Disorganized Schizophrenia); MDD (Major Depressive Disorder); PS (Paranoid Schizophrenia); RS (Residual Schizophrenia); SA (Schizoaffective Disorder); US (Undifferentiated Schizophrenia).

DSM-IV Specifiers: PF (Psychotic Features).

**Supplementary Table S2.** Probesets/genes used in the Y-linked filtering.

| Gene                                        | Gene Name                                                                                                                                              | U219 probe set |
|---------------------------------------------|--------------------------------------------------------------------------------------------------------------------------------------------------------|----------------|
| AMELY                                       | amelogenin, Y-linked                                                                                                                                   | 11735923_x_at  |
| AMELY                                       | amelogenin, Y-linked                                                                                                                                   | 11735922_a_at  |
| AMELY                                       | amelogenin, Y-linked                                                                                                                                   | 11763047_x_at  |
| BPY2 ///<br>BPY2B ///<br>BPY2C              | basic charge, Y-linked, 2 /// basic charge, Y-linked, 2B /// basic charge, Y-linked, 2C                                                                | 11735950_s_at  |
| CDY1 ///<br>CDY1B                           | chromodomain protein, Y-linked, 1 /// chromodomain protein, Y-linked, 1B                                                                               | 11740640_s_at  |
| CDY1 ///<br>CDY1B                           | chromodomain protein, Y-linked, 1 /// chromodomain protein, Y-linked, 1B                                                                               | 11737714_s_at  |
| CDY1 ///<br>CDY1B ///<br>CDY2A ///<br>CDY2B | chromodomain protein, Y-linked, 1 /// chromodomain protein, Y-linked, 1B /// chromodomain protein, Y-linked, 2A /// chromodomain protein, Y-linked, 2B | 11735917_s_at  |
| CSPG4P1Y                                    | chondroitin sulfate proteoglycan 4 pseudogene 1, Y-linked                                                                                              | 11753487_at    |
| DAZ1 /// DAZ2<br>/// DAZ3 ///<br>DAZ4       | deleted in azoospermia 1 /// deleted in azoospermia 2 /// deleted in azoospermia 3 /// deleted in azoospermia 4                                        | 11742214_s_at  |
| DAZ1 /// DAZ2<br>/// DAZ3 ///<br>DAZ4       | deleted in azoospermia 1 /// deleted in azoospermia 2 /// deleted in azoospermia 3 /// deleted in azoospermia 4                                        | 11741801_s_at  |
| DAZ1 /// DAZ2<br>/// DAZ3 ///<br>DAZ4       | deleted in azoospermia 1 /// deleted in azoospermia 2 /// deleted in azoospermia 3 /// deleted in azoospermia 4                                        | 11726143_s_at  |
| DDX3Y                                       | DEAD (Asp-Glu-Ala-Asp) box polypeptide 3, Y-linked                                                                                                     | 11724077_x_at  |
| DDX3Y                                       | DEAD (Asp-Glu-Ala-Asp) box polypeptide 3, Y-linked                                                                                                     | 11749841_x_at  |
| DDX3Y                                       | DEAD (Asp-Glu-Ala-Asp) box polypeptide 3, Y-linked                                                                                                     | 11748424_x_at  |
| DDX3Y                                       | DEAD (Asp-Glu-Ala-Asp) box polypeptide 3, Y-linked                                                                                                     | 11724076_a_at  |
| DDX3Y                                       | DEAD (Asp-Glu-Ala-Asp) box polypeptide 3, Y-linked                                                                                                     | 11724075_a_at  |
| DDX3Y                                       | DEAD (Asp-Glu-Ala-Asp) box polypeptide 3, Y-linked                                                                                                     | 11734664_x_at  |
| DDX3Y                                       | DEAD (Asp-Glu-Ala-Asp) box polypeptide 3, Y-linked                                                                                                     | 11734665_x_at  |
| DDX3Y                                       | DEAD (Asp-Glu-Ala-Asp) box polypeptide 3, Y-linked                                                                                                     | 11756863_a_at  |
| EIF1AY                                      | eukaryotic translation initiation factor 1A, Y-linked                                                                                                  | 11720807_x_at  |
| HSFY1 ///<br>HSFY2                          | heat shock transcription factor, Y-linked 1 /// heat shock transcription factor, Y linked 2                                                            | 11761710_at    |
| HSFY1 ///<br>HSFY2                          | heat shock transcription factor, Y-linked 1 /// heat shock transcription factor, Y linked 2                                                            | 11732660_s_at  |
| HSFY1 ///<br>HSFY2                          | heat shock transcription factor, Y-linked 1 /// heat shock transcription factor, Y linked 2                                                            | 11755570_s_at  |
| KDM5D                                       | lysine (K)-specific demethylase 5D                                                                                                                     | 11726814_x_at  |
| KDM5D                                       | lysine (K)-specific demethylase 5D                                                                                                                     | 11726813_a_at  |
| KDM5D                                       | lysine (K)-specific demethylase 5D                                                                                                                     | 11745012_a_at  |
| KDM5D                                       | lysine (K)-specific demethylase 5D                                                                                                                     | 11755369_a_at  |
| KDM5D                                       | lysine (K)-specific demethylase 5D                                                                                                                     | 11761654_a_at  |
| LOC10050964<br>6 /// PRY ///<br>PRY2        | PTPN13-like protein, Y-linked-like /// PTPN13-like, Y-linked /// PTPN13-like, Y-linked 2                                                               | 11734626_s_at  |
| LOC10050964<br>6 /// PRY ///<br>PRY2        | PTPN13-like protein, Y-linked-like /// PTPN13-like, Y-linked /// PTPN13-like, Y-linked 2                                                               | 11742500_s_at  |
| NCRNA00185                                  | non-protein coding RNA 185 /// testis-specific transcript, Y-linked 14                                                                                 | 11745579_at    |

| Gene                                                                    | Gene Name                                                                                                                                                                                                                                                                                                                                                            | U219 probe set |
|-------------------------------------------------------------------------|----------------------------------------------------------------------------------------------------------------------------------------------------------------------------------------------------------------------------------------------------------------------------------------------------------------------------------------------------------------------|----------------|
| /// TTTY14                                                              | (non-protein coding)                                                                                                                                                                                                                                                                                                                                                 |                |
| NLGN4Y                                                                  | neuroligin 4, Y-linked                                                                                                                                                                                                                                                                                                                                               | 11744945_a_at  |
| NLGN4Y                                                                  | neuroligin 4, Y-linked                                                                                                                                                                                                                                                                                                                                               | 11759789_x_at  |
| NLGN4Y                                                                  | neuroligin 4, Y-linked                                                                                                                                                                                                                                                                                                                                               | 11738620_a_at  |
| NLGN4Y                                                                  | neuroligin 4, Y-linked                                                                                                                                                                                                                                                                                                                                               | 11748414_a_at  |
| PRKY                                                                    | protein kinase, Y-linked, pseudogene                                                                                                                                                                                                                                                                                                                                 | 11729036_x_at  |
| RBM1A1 ///<br>RBM1B ///<br>RBM1D ///<br>RBM1E ///<br>RBM1F ///<br>RBM1J | RNA binding motif protein, Y-linked, family 1, member A1 /// RNA binding motif protein, Y-linked, family 1, member B /// RNA binding motif protein, Y-linked, family 1, member D /// RNA binding motif protein, Y-linked, family 1, member E /// RNA binding motif protein, Y-linked, family 1, member F /// RNA binding motif protein, Y-linked, family 1, member J | 11737478_s_at  |
| RBM1A1 ///<br>RBM1B ///<br>RBM1D ///<br>RBM1E ///<br>RBM1F ///<br>RBM1J | RNA binding motif protein, Y-linked, family 1, member A1 /// RNA binding motif protein, Y-linked, family 1, member B /// RNA binding motif protein, Y-linked, family 1, member D /// RNA binding motif protein, Y-linked, family 1, member E /// RNA binding motif protein, Y-linked, family 1, member F /// RNA binding motif protein, Y-linked, family 1, member J | 11741444_s_at  |
| RBM1A1 ///<br>RBM1B ///<br>RBM1D ///<br>RBM1E ///<br>RBM1F ///<br>RBM1J | RNA binding motif protein, Y-linked, family 1, member A1 /// RNA binding motif protein, Y-linked, family 1, member B /// RNA binding motif protein, Y-linked, family 1, member D /// RNA binding motif protein, Y-linked, family 1, member E /// RNA binding motif protein, Y-linked, family 1, member F /// RNA binding motif protein, Y-linked, family 1, member J | 11752599_s_at  |
| RPS4Y1                                                                  | ribosomal protein S4, Y-linked 1                                                                                                                                                                                                                                                                                                                                     | 11716411_x_at  |
| RPS4Y2                                                                  | ribosomal protein S4, Y-linked 2                                                                                                                                                                                                                                                                                                                                     | 11738932_x_at  |
| RPS4Y2                                                                  | ribosomal protein S4, Y-linked 2                                                                                                                                                                                                                                                                                                                                     | 11738931_at    |
| SRY                                                                     | sex determining region Y                                                                                                                                                                                                                                                                                                                                             | 11738437_at    |
| TBL1Y                                                                   | transducin (beta)-like 1, Y-linked                                                                                                                                                                                                                                                                                                                                   | 11734646_a_at  |
| TBL1Y                                                                   | transducin (beta)-like 1, Y-linked                                                                                                                                                                                                                                                                                                                                   | 11746673_x_at  |
| TMSB4Y                                                                  | thymosin beta 4, Y-linked                                                                                                                                                                                                                                                                                                                                            | 11736926_at    |
| TSPY1 ///<br>TSPY10 ///<br>TSPY2 ///<br>TSPY3 ///<br>TSPY4 ///<br>TSPY8 | testis specific protein, Y-linked 1 /// testis specific protein, Y-linked 10 /// testis specific protein, Y-linked 2 /// testis specific protein, Y-linked 3 /// testis specific protein, Y-linked 4 /// testis specific protein, Y-linked 8                                                                                                                         | 11741782_s_at  |
| TTTY10                                                                  | testis-specific transcript, Y-linked 10 (non-protein coding)                                                                                                                                                                                                                                                                                                         | 11751103_at    |
| TTTY11                                                                  | testis-specific transcript, Y-linked 11 (non-protein coding)                                                                                                                                                                                                                                                                                                         | 11751807_at    |
| TTTY12                                                                  | testis-specific transcript, Y-linked 12 (non-protein coding)                                                                                                                                                                                                                                                                                                         | 11744771_at    |
| TTTY13                                                                  | testis-specific transcript, Y-linked 13 (non-protein coding)                                                                                                                                                                                                                                                                                                         | 11753556_at    |
| TTTY5                                                                   | testis-specific transcript, Y-linked 5 (non-protein coding)                                                                                                                                                                                                                                                                                                          | 11745588_at    |
| TTTY6 ///<br>TTTY6B                                                     | testis-specific transcript, Y-linked 6 (non-protein coding) /// testis-specific transcript, Y-linked 6B (non-protein coding)                                                                                                                                                                                                                                         | 11753641_at    |
| TTTY6 ///<br>TTTY6B                                                     | testis-specific transcript, Y-linked 6 (non-protein coding) /// testis-specific transcript, Y-linked 6B (non-protein coding)                                                                                                                                                                                                                                         | 11753753_s_at  |
| TTTY6 ///<br>TTTY6B                                                     | testis-specific transcript, Y-linked 6 (non-protein coding) /// testis-specific transcript, Y-linked 6B (non-protein coding)                                                                                                                                                                                                                                         | 11753642_x_at  |
| TTTY6B                                                                  | testis-specific transcript, Y-linked 6B (non-protein coding)                                                                                                                                                                                                                                                                                                         | 11763105_at    |
| TTTY6B                                                                  | testis-specific transcript, Y-linked 6B (non-protein coding)                                                                                                                                                                                                                                                                                                         | 11763106_x_at  |
| TTTY8 ///<br>TTTY8B                                                     | testis-specific transcript, Y-linked 8 (non-protein coding) /// testis-specific transcript, Y-linked 8B (non-protein coding)                                                                                                                                                                                                                                         | 11763063_at    |
| TTTY8 ///<br>TTTY8B                                                     | testis-specific transcript, Y-linked 8 (non-protein coding) /// testis-specific transcript, Y-linked 8B (non-protein coding)                                                                                                                                                                                                                                         | 11753633_s_at  |

| <b>Gene</b>        | <b>Gene Name</b>                                                                                                              | <b>U219 probe set</b> |
|--------------------|-------------------------------------------------------------------------------------------------------------------------------|-----------------------|
| TTY9A ///<br>TTY9B | testis-specific transcript, Y-linked 9A (non-protein coding) /// testis-specific transcript, Y-linked 9B (non-protein coding) | 11750283_at           |
| USP9Y              | ubiquitin specific peptidase 9, Y-linked                                                                                      | 11725294_at           |
| USP9Y              | ubiquitin specific peptidase 9, Y-linked                                                                                      | 11725295_s_at         |
| USP9Y              | ubiquitin specific peptidase 9, Y-linked                                                                                      | 11725293_at           |
| UTY                | ubiquitously transcribed tetratricopeptide repeat gene, Y-linked                                                              | 11763812_at           |
| UTY                | ubiquitously transcribed tetratricopeptide repeat gene, Y-linked                                                              | 11739844_at           |
| UTY                | ubiquitously transcribed tetratricopeptide repeat gene, Y-linked                                                              | 11735625_a_at         |
| UTY                | ubiquitously transcribed tetratricopeptide repeat gene, Y-linked                                                              | 11763734_at           |
| UTY                | ubiquitously transcribed tetratricopeptide repeat gene, Y-linked                                                              | 11763858_a_at         |
| UTY                | ubiquitously transcribed tetratricopeptide repeat gene, Y-linked                                                              | 11735945_x_at         |
| UTY                | ubiquitously transcribed tetratricopeptide repeat gene, Y-linked                                                              | 11735626_x_at         |
| UTY                | ubiquitously transcribed tetratricopeptide repeat gene, Y-linked                                                              | 11761675_at           |
| UTY                | ubiquitously transcribed tetratricopeptide repeat gene, Y-linked                                                              | 11763837_s_at         |
| UTY                | ubiquitously transcribed tetratricopeptide repeat gene, Y-linked                                                              | 11763859_x_at         |
| UTY                | ubiquitously transcribed tetratricopeptide repeat gene, Y-linked                                                              | 11763792_a_at         |
| VCY /// VCY1B      | variable charge, Y-linked /// variable charge, Y-linked 1B                                                                    | 11722961_s_at         |
| XKRY ///<br>XKRY2  | XK, Kell blood group complex subunit-related, Y-linked /// XK, Kell blood group complex subunit-related, Y-linked 2           | 11738554_s_at         |
| ZFY                | zinc finger protein, Y-linked                                                                                                 | 11729084_a_at         |
| ZFY                | zinc finger protein, Y-linked                                                                                                 | 11740673_a_at         |
| ZFY                | zinc finger protein, Y-linked                                                                                                 | 11729085_a_at         |

**Supplementary Table S3.** Complete list of significant DEGs related to suicide.

| Layer 3  |              |         | Layer 3  |             |         | Layer 5 |              |         | Layer 5 |              |         |
|----------|--------------|---------|----------|-------------|---------|---------|--------------|---------|---------|--------------|---------|
| DEG      | % change     | q-value | DEG      | % change    | q-value | DEG     | % change     | q-value | DEG     | % change     | q-value |
| PLCH1    | <b>-52.7</b> | 0.0941  | KLF10    | <b>89.3</b> | 0.0759  | TNRC6A  | <b>-52.4</b> | 0.0762  | RIOK1   | <b>116.0</b> | 0.0762  |
| PRDM8    | <b>-52.5</b> | 0.0159  | ADIPOR1  | <b>84.5</b> | 0.0478  |         |              |         | PRPS2   | <b>63.3</b>  | 0.0762  |
| CMIP     | <b>-40.8</b> | 0.0362  | WDR77    | <b>71.2</b> | 0.0825  |         |              |         |         |              |         |
| ATG13    | <b>-37.6</b> | 0.0113  | RPS29    | <b>69.3</b> | 0.0759  |         |              |         |         |              |         |
| SH3PXD2A | <b>-36.4</b> | 0.0583  | UBE2A    | <b>66.8</b> | 0.0703  |         |              |         |         |              |         |
| UVRAG    | <b>-35.0</b> | 0.0776  | TIMM8B   | <b>65.0</b> | 0.0781  |         |              |         |         |              |         |
| ZNF652   | <b>-34.7</b> | 0.0478  | GPATCH11 | <b>63.2</b> | 0.0581  |         |              |         |         |              |         |
| EPB41L1  | <b>-34.5</b> | 0.0478  | PSMB5*   | <b>59.2</b> | 0.0362  |         |              |         |         |              |         |
| CAMK2G   | <b>-32.0</b> | 0.0998  | RGL1     | <b>57.9</b> | 0.0734  |         |              |         |         |              |         |
| NFASC    | <b>-31.7</b> | 0.0627  | UBE2D3   | <b>56.0</b> | 0.0833  |         |              |         |         |              |         |
| DGKZ     | <b>-31.0</b> | 0.0581  | PSMB5    | <b>55.0</b> | 0.0428  |         |              |         |         |              |         |
| CACNA1I  | <b>-29.3</b> | 0.0794  | ASPHD2   | <b>50.5</b> | 0.0766  |         |              |         |         |              |         |
| YPEL3    | <b>-29.0</b> | 0.0036  | TM9SF3   | <b>47.6</b> | 0.0998  |         |              |         |         |              |         |
| CCDC92*  | <b>-28.4</b> | 0.0159  | UBE2A    | <b>42.3</b> | 0.0759  |         |              |         |         |              |         |
| CYFIP2   | <b>-27.4</b> | 0.0811  | BNIP3L   | <b>42.2</b> | 0.0478  |         |              |         |         |              |         |
| DDX24    | <b>-24.2</b> | 0.0759  | SMNDC1   | <b>41.7</b> | 0.0825  |         |              |         |         |              |         |
| MAST1    | <b>-23.9</b> | 0.0744  | MRPL51   | <b>34.3</b> | 0.0509  |         |              |         |         |              |         |
| SORT1    | <b>-23.6</b> | 0.0408  | PSMB5    | <b>33.5</b> | 0.0766  |         |              |         |         |              |         |
| SPTAN1   | <b>-22.6</b> | 0.0362  | BZW1     | <b>30.9</b> | 0.0478  |         |              |         |         |              |         |
| ANKRD17  | <b>-20.7</b> | 0.0759  | DLD      | <b>29.0</b> | 0.0736  |         |              |         |         |              |         |
| GNAO1    | <b>-16.4</b> | 0.0962  | UQCRB    | <b>26.2</b> | 0.0817  |         |              |         |         |              |         |
| TRIM2    | <b>-15.2</b> | 0.0811  | GMFB*    | <b>25.7</b> | 0.0817  |         |              |         |         |              |         |
| RAB7A    | <b>-14.0</b> | 0.0535  | RGS4     | <b>22.2</b> | 0.0817  |         |              |         |         |              |         |
|          |              |         | FBXW7    | <b>12.5</b> | 0.0773  |         |              |         |         |              |         |
|          |              |         | BEX1     | <b>11.9</b> | 0.0362  |         |              |         |         |              |         |

\*Indicates DEG with more than one significant DEP; data for the DEP with the greatest percentage difference is shown at FDR 0.1.



**Supplementary Figures**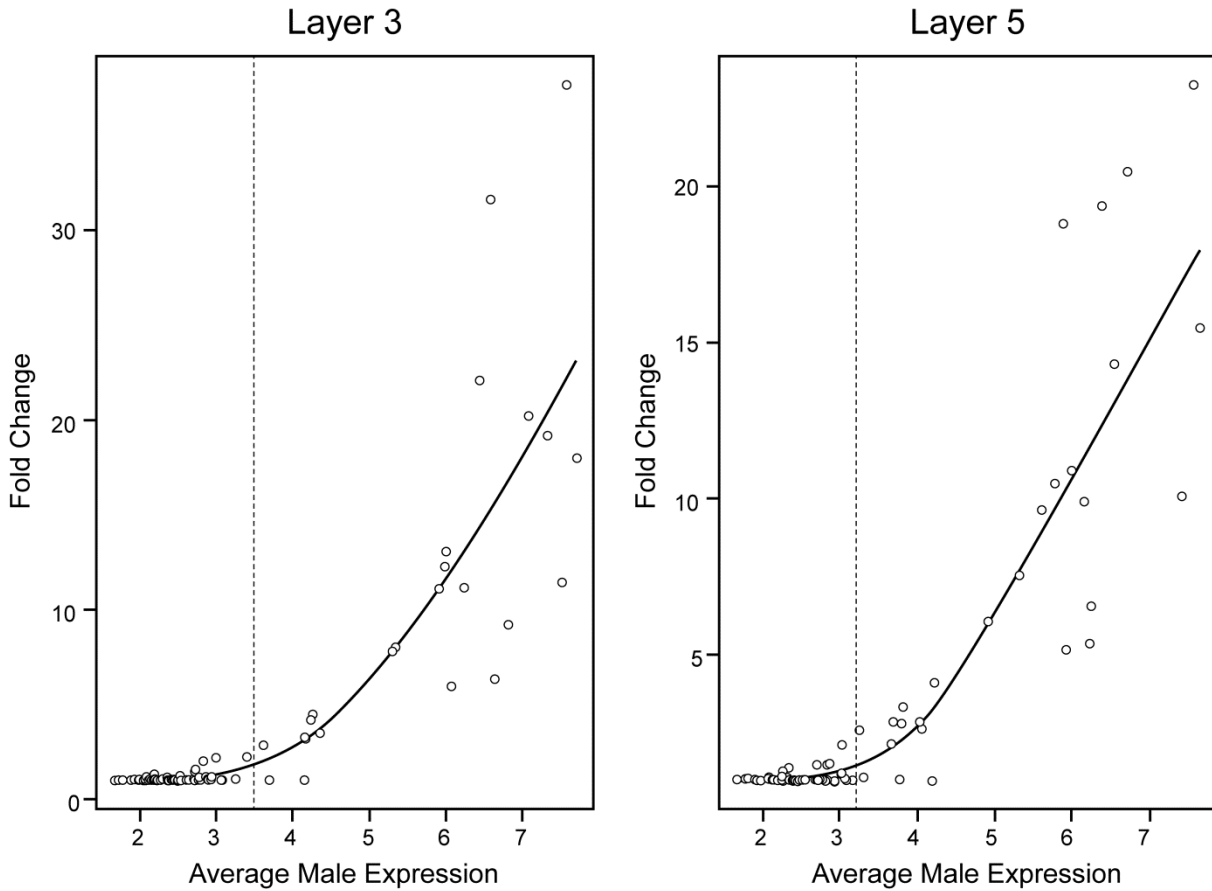

**Supplementary Figure S1.** Y chromosome-linked filtering of non-informative probesets. The x axis represents the average expression for a subset of Y chromosome-linked probesets for male subjects. The y axis represents the enrichment in fold change of the expression of the Y chromosome-linked probesets in male subjects compared to female subjects. The inflection point of a lowess curve fitted to the scatter plot was then determined. The mean (MEAN) and standard deviation (SD) of fold enrichment (y-axis) was calculated for probes with average male expression (x-axis) below 3. The x-axis cut-point (filtering threshold) was chosen to correspond to the fold enrichment at  $\text{MEAN}+3*\text{SD}$  (y-axis) on the fitted curve.

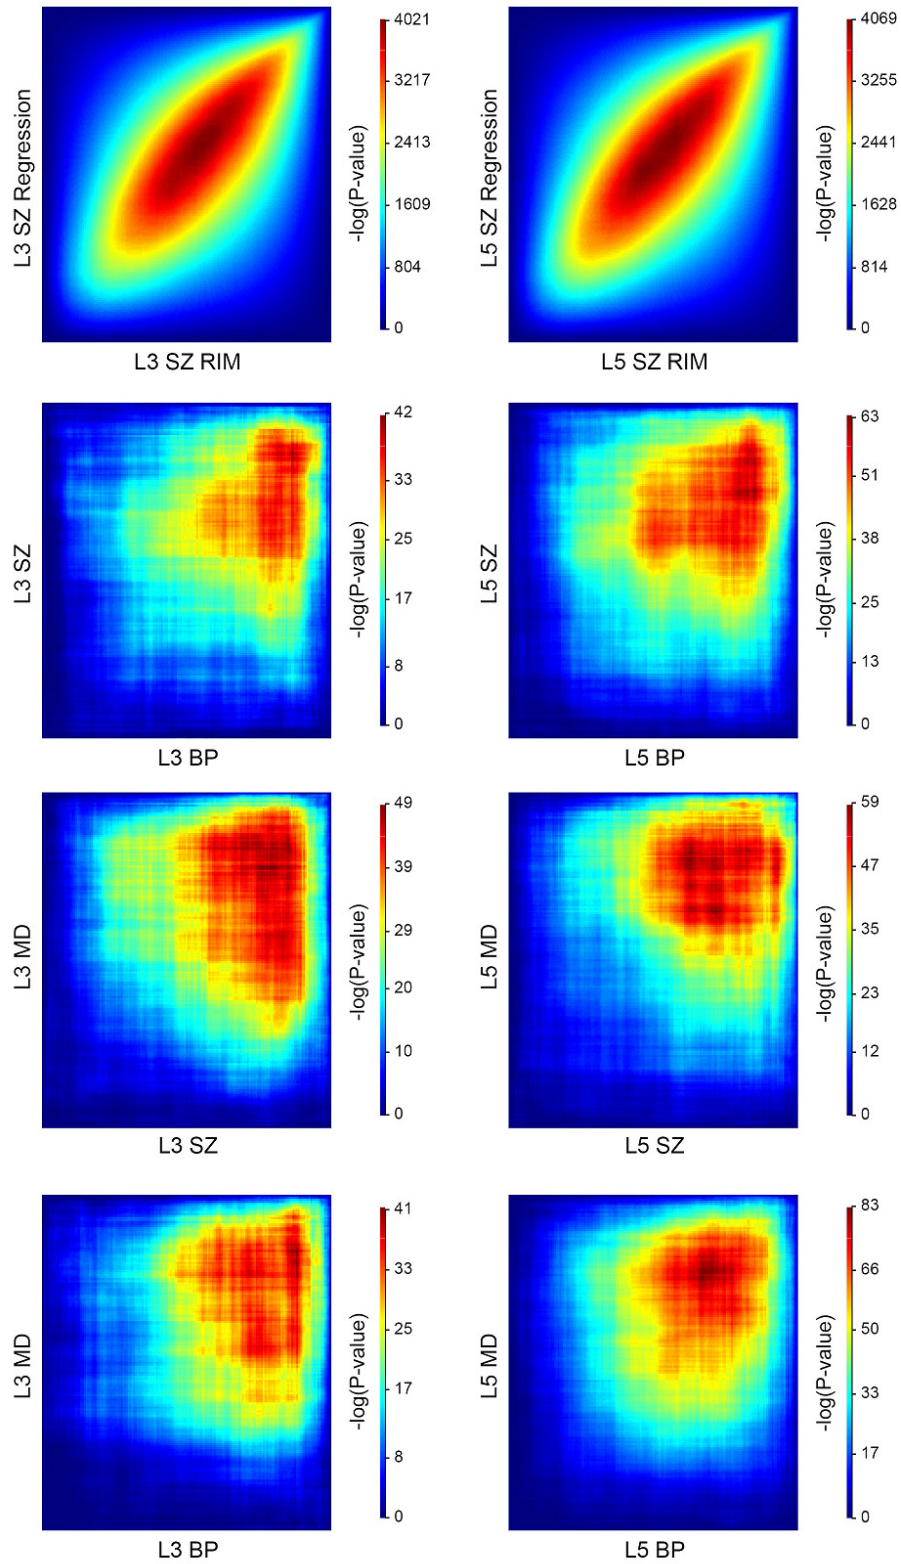

**Supplementary Figure S2:** Rank-rank hypergeometric overlap (RRHO) plot of all Y-chromosome filtered probesets ( $n= 27,298$ ). X-axis (left to right) and Y-axis (bottom to top) are ranked by differential expression p-value from 0 to 1. Each dot in the heatmap represents an

enrichment level via  $\log_{10}$  (p-value) of a hypergeometric test and the corresponding X-axis and Y-axis represent varying p-value cutoffs. Increasing enrichment levels are depicted using colors from blue to red. The color scale legend is indicated on the right hand side of each comparison. Please note that the scale differs for each comparison due to variations in the p-value distribution for SZ, BP and MDD. First row: unpaired (regression and paired (RIM) analysis comparison. Following rows: transcriptome-wide comparisons of SZ vs BP, SZ vs MDD and BP vs MDD for L3 and L5 PCs through RRHO.

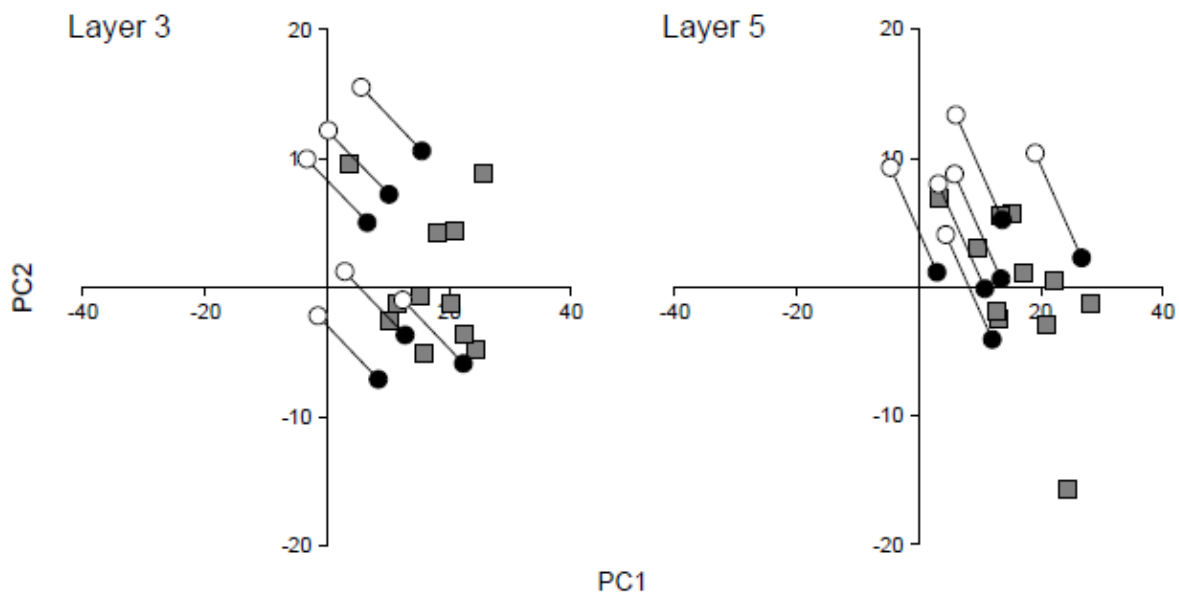

**Supplementary Figure S3.** Principal component analysis for DEPs in L3 and L5 PCs for SZ subjects with or without a diagnosis of schizoaffective disorder (SA). The data points for SA subjects are shown before and after correction by the statistical analysis model used in this study. The subjects with a diagnosis of pure SZ are represented by gray squares; the subjects with a diagnosis of SA before correction for the effect of mood are represented by open circles and after correction by black circles. Note that after correction, SA subjects cluster more tightly with all other SZ subjects.

## Supplementary References

1. Arion D, Corradi JP, Tang S, et al. Distinctive transcriptome alterations of prefrontal pyramidal neurons in schizophrenia and schizoaffective disorder. *Mol. Psychiatry*. 2015;20(11):1397-1405.
2. Galfalvy HC, Erraji-Benchekroun L, Smyrniotopoulos P, et al. Sex genes for genomic analysis in human brain: internal controls for comparison of probe level data extraction. *BMC Bioinformatics*. 2003;4:37.
3. Wang X, Lin Y, Song C, Sibille E, Tseng GC. Detecting disease-associated genes with confounding variable adjustment and the impact on genomic meta-analysis: with application to major depressive disorder. *BMC Bioinformatics*. 2012;13:52.
4. Storey JD. A direct approach to false discovery rates. *J R Stat Soc*. 2002;64(Series B):479-498.
